# Supplementary material
Source: PubMed Central journal article supplement (PMC2278002)
Supplement: NIHMS39011-supplement-01.pdf [file NIHMS39011-supplement-01.pdf]

## **SUPPLEMENTAL INFORMATION**

### **MATERIALS AND METHODS**

#### *Nuclear extracts preparation*

Nuclear extracts from SW-13 and HeLa cells were obtained by harvesting the exponentially growing cells ( $10^8$ ). The pelleted cells were washed with cold PBS and resuspended in 1 ml of lysis buffer (10mM HEPES [pH 7.9], 1.5 mM  $MgCl_2$ , 10 mM KCl, 1mM phenylmethylsulfonyl fluoride and proteinase inhibitor cocktail). After dounce homogenizing with a glass homogenizer the nuclei were pelleted and extracted for 30 min at 4°C with 1 ml of extraction buffer (20 mM HEPES [pH 7.9], 0.42 mM NaCl, 1.5 mM  $MgCl_2$ , 0.2 mM EDTA, 20% glycerol, 1mM phenylmethylsulfonyl fluoride and proteinase inhibitor cocktail).

#### *Electrophoretic mobility shift assay (EMSA)*

For EMSA, the nuclear extracts from SW-13 and HeLa cells or the in vitro translated TEF-1 were used. The probes are listed in Figure 1B and Figure 3D. Nuclear extracts (3  $\mu$ g) and in vitro translated products were pre-incubated with 0.2  $\mu$ g and 0.02  $\mu$ g of the non-specific carrier DNA poly (dI.dC) (Sigma), respectively, for 30 min at 4°C. 1.6  $\mu$ l Binding buffer (200 mM Tris-Hcl [pH 7.5], 500 mM NaCl, 30 mM EDTA, 20% glycerol, 0.5% NP-40) and annealed [ $\gamma$ - $^{32}$ P]ATP labelled oligonucleotide probes (0.25 ng) were then added to a final volume of 20  $\mu$ l. For competition assays, 100-fold excess of the unlabelled probe was added and incubated at 4°C for 15 min prior to the addition of the labeled probe. The protein/DNA complexes formed were resolved by non-

denaturing polyacrylamide gel electrophoresis. For supershift assays, 2  $\mu$ g of antibodies were added to the reaction mixture and pre-incubated for 30 min at 4°C before resolving on the gel.

#### *DNA affinity protein purification and mass spectrometry*

Forward and reverse complementary 5' biotinylated oligonucleotides (Fig. 1B) were used to achieve concatamerization of protein binding sites using the self primed PCR technique [1,2]. The PCR reaction mixture consisted of 10 pmol of wild type or mutant oligonucleotides, *Tgo* DNA polymerase (Roche), 1 mM dNTPs and 2.5 mM MgCl<sub>2</sub>. The PCR cycling conditions were as follows: 95°C for 3 min, 30 cycles of 95°C for 30 s, 54°C for 40 s and 72°C for 2 min followed by 72°C for 10 min. The product size ranged from 0.3 to 10 kb. Streptavidin Magnesphere Paramagnetic Particles (Promega) were washed with the wash buffer (20 mM HEPES [pH 7.9], 100 mM NaCl, 1.5 mM MgCl<sub>2</sub>, 0.2 mM EDTA, 20% glycerol, 1mM phenylmethylsulfonyl fluoride and proteinase inhibitor cocktail) thrice. 75  $\mu$ l of the PCR products were added to 300  $\mu$ l beads and incubated for 15 min at 4°C. The beads were then washed to remove the unbound DNA. Nuclear extracts were diluted with binding buffer and pre-incubated with poly (dI.dC) (0.015  $\mu$ g/ $\mu$ g protein) for 30 min at 4°C followed by its addition to the paramagnetic beads and incubation on ice for 1 h. The beads were collected and washed thrice. The bound proteins were eluted with the binding buffer containing 600 mM NaCl and resolved by SDS-PAGE and stained with silver nitrate. The protein band was excised from the gel and identified by MALDI-TOF mass spectrometry carried out at the Lerner

Research Institute, Mass Spectrometry Laboratory for Protein Sequencing, the Cleveland clinic foundation, Cleveland, Ohio.

## **REFERENCES**

- [1] Hemat, F. and McEntee, K. (1994) A rapid and efficient PCR-based method for synthesizing high-molecular-weight multimers of oligonucleotides. *Biochem Biophys Res Commun.* 205, 475-81.
- [2] Xue, H.H. et al. (2004) GA binding protein regulates interleukin 7 receptor alpha-chain gene expression in T cells. *Nat Immunol.* 5, 1036-44.
